# Supplementary material
Source: PubMed Central journal article supplement (PMC2673504)
Supplement: NIHMS94222-supplement-01.pdf [file NIHMS94222-supplement-01.pdf]

Supplemental Data

Article

Regulation of the IL-23 and IL-12 Balance

by Stat3 Signaling in the Tumor Microenvironment

Marcin Kortylewski, Hong Xin, Maciej Kujawski, Heehyoung Lee, Yong Liu, Timothy Harris, Charles Drake, Drew Pardoll, and Hua Yu

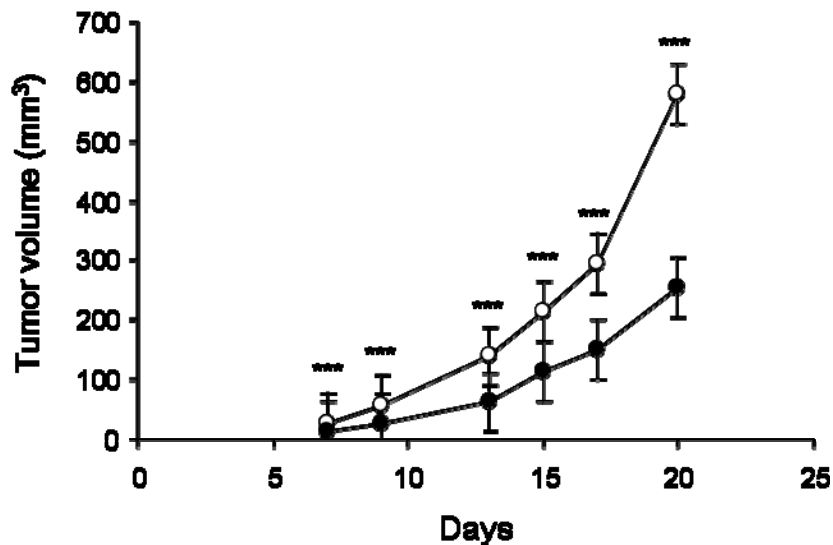

Figure S1. Ablating Stat3 in Hematopoietic Cells Inhibits Growth of MC38 Tumors

*Mx1-Cre/Stat3<sup>flox/flox</sup>* (●) and *Stat3<sup>flox/flox</sup>* (○) mice were treated with poly(I:C) and 4 days later challenged with  $5 \times 10^5$  MC38 tumor cells injected subcutaneously. Results shown are representative of two independent experiments; mean  $\pm$  SD. \*\*\*p < 0.001 (n = 10 for each experiment).

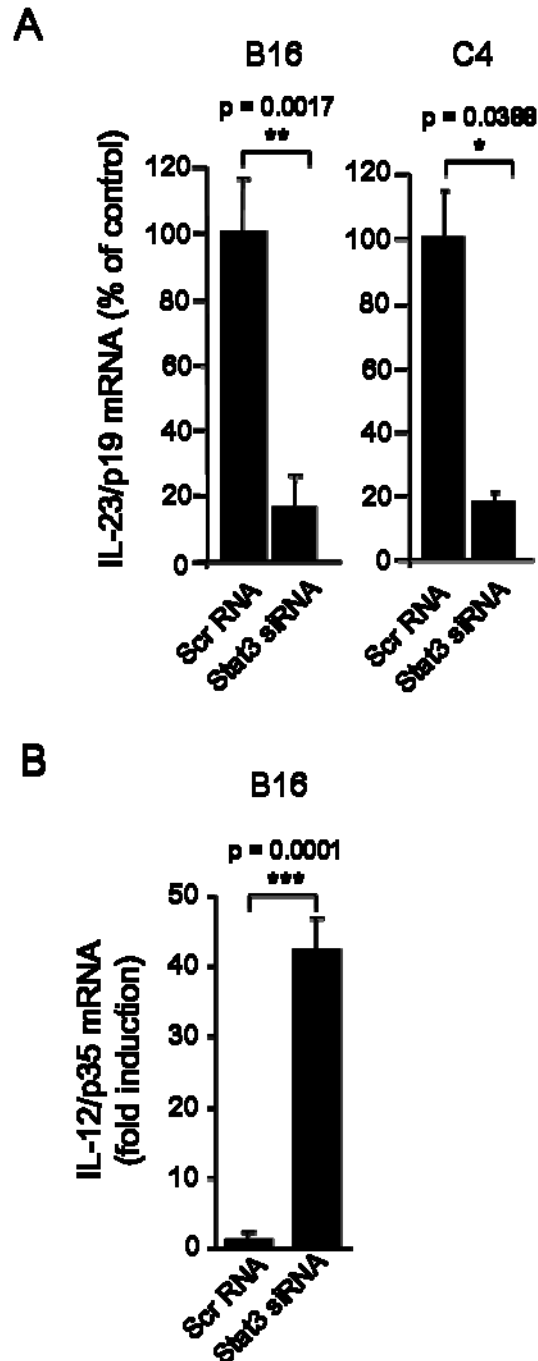

**Figure S2. Stat3-Mediated Enhancement of *IL-23/p19* and Inhibition of *IL-12/p35* Gene Expression Are Detectable in Cultured Tumor Cells**

(A) *Stat3* silencing downregulates expression of *IL-23/p19* mRNA in B16 and C4 tumor cell lines.

(B) *Stat3* knockdown augments *IL-12/p35* expression in cultured B16 tumor cells. Results from one of three independent experiments analyzed by real-time PCR are shown, normalized to 18S rRNA; mean  $\pm$  SD (n = 3).
